# Supplementary material
Source: ML conference proceedings conference paper supplement (https://openreview.net/forum?id=BaMkS6E2Du)
Supplement: supplementary_material [file attachment]

The source code for reproducing the results is available in an anonymous repository: [https://drive.google.com/drive/folders/1cwjawPEIErb0dh9IFWY6REfEwlixoCVC?usp=drive\\_link](https://drive.google.com/drive/folders/1cwjawPEIErb0dh9IFWY6REfEwlixoCVC?usp=drive_link). This repository will remain anonymous until the end of the review process to preserve the double-blind nature of the review.
